# Supplementary material for: Coalitions for Landscape Resilience: Institutional Dynamics behind Community-Based Rangeland Management System in North-Western Tanzania
Source: MDPI journal article supplement (doi:10.3390/su131910939), 2021-10-01
Supplement: s1 [file s1]

**Table S1. List of institutional actors, their characteristics, 4Rs and notes on differences between the intervention and non-intervention villages.**

| Institution                             | Characterization                                                                                                                                                                                                            | Rights                                                                                                    | Responsibilities                                                                                                                                                     | Resources (ngitili benefits and other resources)                                                                                                            | Notes                                                                                                                                                                        |
|-----------------------------------------|-----------------------------------------------------------------------------------------------------------------------------------------------------------------------------------------------------------------------------|-----------------------------------------------------------------------------------------------------------|----------------------------------------------------------------------------------------------------------------------------------------------------------------------|-------------------------------------------------------------------------------------------------------------------------------------------------------------|------------------------------------------------------------------------------------------------------------------------------------------------------------------------------|
| Village council (VC)                    | Popularly elected council of 15-25 members with village chairperson as the chair and often VEO as the secretary. They plan and coordinate activities and formulate bylaws, which are rendered to village assembly approval. | Objective setting, monitoring, benefiting                                                                 | Ngitili owner's responsibilities† and involves village assembly in decision-making                                                                                   | Several sources of financial resources incl. REDD money, annual budget some thousands USD, lack of money, transport, education, stationaries etc.           | In non-intervention village subvillage administration instead more important, has rights to benefits and has owner's responsibilities                                        |
| Village chairperson                     | Popularly elected chair of the village.                                                                                                                                                                                     | Monitoring                                                                                                | Ngitili owner's responsibilities† as a village council member                                                                                                        | Small allowance, annual budget some hundreds USD (from own pocket), lack of money, transport, education, stationaries etc.                                  |                                                                                                                                                                              |
| Village executive officer (VEO)         | Appointed by District execute officer. Supervise and report on village development activities to district.                                                                                                                  | Monitoring                                                                                                | Ngitili owner's responsibilities† as a village council member                                                                                                        | Small allowance, annual budget some tens USD (from own pocket), lack of money, transport, education, stationaries etc.                                      |                                                                                                                                                                              |
| Subvillage administration (chairperson) | Elected representative of subvillage. Supervise and manage subvillage activities. Depending on village include a secretary and 2-3 advisors                                                                                 | Objective setting, monitoring, benefiting                                                                 | Ngitili owner's responsibilities† (in intervention villages does not give permits or punishments or make rules)                                                      | Supervision fee of property sales, annual budget none or some hundreds USD (from own pocket), lack of money, transport, stationaries, education, staff etc. | In intervention villages doesn't have rights to benefits, in village A allowance sometimes and money from permits                                                            |
| REDD project                            | REDD pilot project 2010-2013 coordinated by NGO TaTEDO in partnership with government public service centre NAFRAC                                                                                                          | Facilitation                                                                                              | Resolve conflicts, advise on rule making, revenue distribution and ngitili allocation                                                                                | Donor funding, ~ 2 million USD for 4 year project, lack of funds for follow up                                                                              | In intervention villages only, project active 2010-2013 and currently occational monitory visits                                                                             |
| Land and Natural Resources Department   | District department with forest officer and assistant officers. Enforce laws and policies and link NGOs, CBOs and private sector with public sector in NRM                                                                  | Facilitation, monitoring, initiate revoking of village management agreement (revoked by district council) | Enforce and inform on rules, give punishments and resolve conflicts if village and ward level fails, advise on rule making, revenue distribution, ngitili allocation | Taxes and fines via district council, annual budget some tens of thousands USD, lack of money, transport, education, staff etc.                             | Msalala district council has less financial sources and smaller budget than Kahama town council which decrease resources allocated to department and ward and village level. |
| Sungusungu                              | Community law and order policing organization, vigilante movement. Set administration, commanders at subvillage, village and ward level. All village inhabitants constitute the sungusungu army.                            | Benefiting                                                                                                | Enforce and inform on rules, give punishments and resolve conflicts, involved in rule making                                                                         | Different fines and REDD money, annual budget some tens or hundreds USD, lack of money, transport, weapons, equipment etc.                                  | In village A not involved in giving punishments or conflict resolution, In non-intervention village no revenue from ngitili                                                  |

| Institution                             | Characterization                                                                                                                                                                                           | Rights                                                    | Responsibilities                                                                                                                                           | Resources (ngitili benefits and other resources)                                                                                                                     | Notes                                                                           |
|-----------------------------------------|------------------------------------------------------------------------------------------------------------------------------------------------------------------------------------------------------------|-----------------------------------------------------------|------------------------------------------------------------------------------------------------------------------------------------------------------------|----------------------------------------------------------------------------------------------------------------------------------------------------------------------|---------------------------------------------------------------------------------|
| Primary school (school committee)       | Primary schools have established ngitilis which are managed by the school committees in collaboration with village council.                                                                                | Objective setting, use and benefiting from school ngitili | Ngitili owner's responsibilities†, in village A doesn't give permits which are given by village council, resolve conflicts and land conflicts on own lands | Several sources of financial resources incl. REDD money, annual budget some hundreds or thousands USD, lack of money, transport, equipment etc.                      | In village A after REDD project they need permit from village council for usage |
| Village REDD group                      | Organization of ngitili owners who were registered during REDD pilot project and are eligible for carbon credits. Registered village, subvillage and school ngitilis also represented in the organization. | Objective setting, monitoring and benefiting              | Make rules, enforce and inform on rules, resolve conflicts                                                                                                 | REDD money and group IGAs, annual budget some hundreds USD, lack of money, transport, equipment, education etc.                                                      | Exists in intervention villages only                                            |
| Village land council                    | Committee dealing with land registration and conflict resolution. Each subvillage has a representative.                                                                                                    | None                                                      | Enforce and inform on rules and resolve land conflicts                                                                                                     | Fee for opening a case, annual budget none, lack money, transport, stationaries, education etc.                                                                      | Doesn't exist in village B                                                      |
| Village environmental committee         | Committee dealing with environmental safety and conservation.                                                                                                                                              | Monitoring                                                | Make rules, enforce and inform on rules and resolve conflicts                                                                                              | Sometimes support from village council or individuals, annual budget none or some tens USD (from own pocket), lack of money, transport, stationaries, education etc. | Doesn't exist in non-intervention village                                       |
| Elders' council, village and subvillage | Depending on village has one or several councils in subvillage and representatives from these form the village level council. Only men. Preserve traditions and resolve conflicts.                         | Monitoring                                                | Enforce and inform on rules, resolve conflicts and land conflicts, advise on rule making and ngitili allocation                                            | Different fines and group IGAs, annual budget some tens USD, lack of money, transport, stationaries, education etc.                                                  | In non-intervention village works closely with subvillage chairperson           |
| Village inhabitants (village assembly)  | Persons over the age of 18 constitute the village assembly.                                                                                                                                                | Objective setting, use and benefiting                     | Approve rules, permits and revenue distribution, enforce rules (patrol)                                                                                    | NA                                                                                                                                                                   | Village inhabitants constitute the sungu sungu army                             |
| Ward agricultural officer               | Extension worker in agriculture, livestock and forestry matters. Works in all villages.                                                                                                                    | Monitoring                                                | Enforce and inform on rules, resolve conflicts (evaluate extent of violation), advise on rules and ngitili allocation                                      | Salary from central government, annual budget none or some hundreds (from own pocket), lack of money, transport, stationaries, equipment, education etc.             | Doesn't work in non-intervention village                                        |

| Institution                                    | Characterization                                                                                          | Rights                   | Responsibilities                                                                                                                                                                  | Resources (ngitili benefits and other resources)                                                                                                                             | Notes                                                                  |
|------------------------------------------------|-----------------------------------------------------------------------------------------------------------|--------------------------|-----------------------------------------------------------------------------------------------------------------------------------------------------------------------------------|------------------------------------------------------------------------------------------------------------------------------------------------------------------------------|------------------------------------------------------------------------|
| Mgambo                                         | People's militia, each ward has one or more officers.                                                     | None                     | Enforce and inform on rules (patrol, arrest violators)                                                                                                                            | Fine money from violators, annual budget some tens USD (from own pocket), lack of money, transport, weapons, staff etc.                                                      | In village B and village C not working on ngitili issues               |
| Ward executive officer (WEO)                   | Appointed by District executive officer. Supervise and report on ward development activities to district. | Monitoring               | Make rules (approve, send to district), enforce and inform on rules, if village fails resolve conflicts and land conflicts, advise on revenue distribution and ngitili allocation | Salary from central government and irregular grants from district, annual budget some tens or hundreds (from own pocket), lack of money, transport, stationaries, staff etc. | In village B no district grants                                        |
| Councilor                                      | Elected by popular vote in ward. Represent ward in district council.                                      | Monitoring               | Make rules (approve, send to district), enforce and inform on rules, if village fail resolve conflicts and land conflicts                                                         | Monthly allowance and sitting allowance, annual budget some thousands USD (in village B from own pocket), lack of money, transport, education etc.                           | In village B no allowance but money for transport                      |
| NGOs and CBOs                                  | Village or district level organizations and associations.                                                 | Facilitation             | Advice on and support ngitili management, inform on rules                                                                                                                         | Different donors, member fees, CBOs also from IGAs, annual budget range from some thousands upto million USD, lack of money, transport, education, funders etc.              | Operates only in intervention villages                                 |
| Ward land tribunal                             | Ward tribunal dealing with land conflict resolution. Each village has a representative.                   | None                     | Enforce and inform on rules, if village fails give punishments, resolve conflicts and land conflicts                                                                              | Fees for opening a case, annual budget none or some tens USD, lack of money, transport, stationaries, staff, education etc.                                                  |                                                                        |
| Primary court                                  |                                                                                                           | None                     | Enforce rules, give punishments, resolve conflicts                                                                                                                                | Salaries, permits and fines, annual budget NA, lack of money, transport, stationaries, staff etc.                                                                            | In village B and village C has not been involved in ngitili management |
| Tanzania Forest Service (TFS), Kahama district | 2013 established government agency for revenue collection and national forest resource management.        | Facilitation, benefiting | Advise on rule making and enforcement, revenue distribution, if lower levels fail resolve conflicts, inform on rules                                                              | Several sources of financial resources, annual budget some tens of thousands USD, lack of money, transport, equipment, staff, education etc.                                 | The village and ward level do not recognize TFS as ngitili institution |

† make rules, give permits, decide revenue distribution, enforce rules, give punishments, allocate ngitilis, resolve conflicts, resolve land conflicts and inform on rules.
