# Supplementary material for: Coalitions for Landscape Resilience: Institutional Dynamics behind Community-Based Rangeland Management System in North-Western Tanzania
Source: MDPI journal article supplement (doi:10.3390/su131910939), 2021-10-01
Supplement: s1 [file s1]

**Table S2. Social network analysis scores. Degree centrality in information, decision and work sharing of each institutional actor and network cohesion measures of all the study villages based on social network analysis.**

| Village A              |                   |          |       |       | Village B            |                   |          |       |       | Village C             |                   |          |       |       |
|------------------------|-------------------|----------|-------|-------|----------------------|-------------------|----------|-------|-------|-----------------------|-------------------|----------|-------|-------|
| Institution            | Degree centrality |          |       |       | Institution          | Degree centrality |          |       |       | Institution           | Degree centrality |          |       |       |
|                        | Info              | Decision | Work  | Mean  |                      | Info              | Decision | Work  | Mean  |                       | Info              | Decision | Work  | Mean  |
| Ward agr. officer      | 23                | 15       | 19    | 19.0  | Ward agr. officer    | 21                | 16       | 18    | 18.3  | L.N.R. dept distr.    | 15                | 12       | 10    | 12.3  |
| Village chair.         | 20                | 15       | 14    | 16.3  | Vill. REDD group     | 19                | 16       | 15    | 16.7  | Sungusungu            | 14                | 11       | 9     | 11.3  |
| Sungusungu             | 18                | 15       | 14    | 15.7  | VEO                  | 20                | 15       | 15    | 16.7  | Councilor             | 14                | 8        | 10    | 10.7  |
| Vill. council          | 19                | 15       | 12    | 15.3  | Village chair.       | 21                | 14       | 15    | 16.7  | Village chair.        | 11                | 9        | 9     | 9.7   |
| L.N.R. dept distr.     | 21                | 13       | 11    | 15.0  | Vill. council        | 19                | 15       | 15    | 16.3  | WEO                   | 11                | 8        | 8     | 9.0   |
| VEO                    | 18                | 12       | 14    | 14.7  | Sungusungu           | 23                | 13       | 10    | 15.3  | VEO                   | 11                | 7        | 7     | 8.3   |
| Vill. REDD group       | 18                | 14       | 11    | 14.3  | Subvill. chair       | 19                | 12       | 13    | 14.7  | Vill. council         | 11                | 7        | 4     | 7.3   |
| WEO                    | 23                | 10       | 8     | 13.7  | WEO                  | 20                | 12       | 12    | 14.7  | Elders' council       | 9                 | 8        | 5     | 7.3   |
| Councilor              | 19                | 10       | 10    | 13.0  | Vill. env. commit    | 17                | 12       | 13    | 14.0  | Subvill. chair        | 9                 | 5        | 4     | 6.0   |
| Elders' council        | 17                | 11       | 11    | 13.0  | NGO                  | 16                | 14       | 10    | 13.3  | Subvill. chair        | 9                 | 5        | 4     | 6.0   |
| Vill. env. commit      | 16                | 11       | 11    | 12.7  | L.N.R. dept distr.   | 18                | 9        | 9     | 12.0  | Subvill. chair        | 9                 | 4        | 4     | 5.7   |
| REDD project           | 18                | 6        | 10    | 11.3  | Councilor            | 16                | 10       | 8     | 11.3  | School                | 11                | 0        | 0     | 3.7   |
| Subvill. chair         | 16                | 8        | 9     | 11.0  | REDD project         | 17                | 6        | 10    | 11.0  | Ward agr. officer     | 3                 | 3        | 2     | 2.7   |
| Subvill. chair         | 17                | 8        | 8     | 11.0  | Ward dev. officer    | 15                | 8        | 9     | 10.7  | Vill. land council    | 7                 | 0        | 0     | 2.3   |
| Mgambo                 | 16                | 1        | 14    | 10.3  | Vill. association    | 12                | 8        | 9     | 9.7   | TFS                   | 3                 | 2        | 2     | 2.3   |
| NGO                    | 19                | 5        | 7     | 10.3  | Vill. association    | 12                | 9        | 8     | 9.7   | Sungusungu, ward      | 2                 | 2        | 2     | 2.0   |
| School                 | 21                | 0        | 0     | 7.0   | Elders' council      | 13                | 8        | 8     | 9.7   | REDD project          | 2                 | 2        | 2     | 2.0   |
| Religious inst.        | 10                | 4        | 7     | 7.0   | Vill. association    | 10                | 8        | 8     | 8.7   | Subvill. patrol team  | 2                 | 2        | 2     | 2.0   |
| Ten cell leader        | 11                | 5        | 3     | 6.3   | School               | 16                | 0        | 0     | 5.3   | Ward educ. officer    | 3                 | 1        | 1     | 1.7   |
| Police                 | 8                 | 5        | 6     | 6.3   | Ward land trib.      | 12                | 0        | 1     | 4.3   | Ward dev. officer     | 2                 | 2        | 1     | 1.7   |
| Primary court          | 14                | 0        | 3     | 5.7   | Mgambo               | 10                | 2        | 0     | 4.0   | Police                | 2                 | 1        | 1     | 1.3   |
| Env. dept, distr.      | 8                 | 1        | 4     | 4.3   | Traditional healer   | 6                 | 0        | 2     | 2.7   | District council      | 2                 | 1        | 1     | 1.3   |
| Livestock dept, distr. | 5                 | 4        | 3     | 4.0   | Ward educ. officer   | 2                 | 2        | 2     | 2.0   | Member of parliament  | 1                 | 1        | 1     | 1.0   |
| Other depts, distr.    | 5                 | 2        | 4     | 3.7   | TFS                  | 3                 | 1        | 1     | 1.7   | Sungu sungu, district | 1                 | 1        | 1     | 1.0   |
| DED                    | 6                 | 2        | 1     | 3.0   | Police               | 2                 | 1        | 1     | 1.3   | NGO                   | 1                 | 1        | 1     | 1.0   |
| Vill. land council     | 7                 | 2        | 0     | 3.0   | Neighboring vill.    | 2                 | 1        | 1     | 1.3   | NR dept, region       | 1                 | 1        | 1     | 1.0   |
| Ward land trib.        | 6                 | 0        | 2     | 2.7   | DED                  | 2                 | 1        | 1     | 1.3   | Env. CBOs             | 1                 | 1        | 1     | 1.0   |
| Elders' councl., ward  | 4                 | 1        | 2     | 2.3   | Env. CBOs            | 1                 | 1        | 1     | 1.0   | NAFRAC                | 1                 | 1        | 1     | 1.0   |
| TFS                    | 3                 | 2        | 2     | 2.3   | NAFRAC               | 1                 | 1        | 1     | 1.0   | Distr. commissioner   | 1                 | 0        | 1     | 0.7   |
| Ward educ. officer     | 3                 | 1        | 2     | 2.0   | Primary court        | 2                 | 0        | 0     | 0.7   | Ward land trib.       | 2                 | 0        | 0     | 0.7   |
| Env. CBOs              | 3                 | 0        | 2     | 1.7   | Other depts, distr.  | 1                 | 1        | 0     | 0.7   | Town director         | 1                 | 0        | 1     | 0.7   |
| District council       | 2                 | 1        | 1     | 1.3   | Sungusungu, ward     | 1                 | 0        | 0     | 0.3   | Tradit. drum group    | 1                 | 0        | 0     | 0.3   |
| Educ. dept, distr.     | 3                 | 0        | 0     | 1.0   | Land council, region | 1                 | 0        | 0     | 0.3   | Private dev. actor    | 1                 | 0        | 0     | 0.3   |
| Agroforestry project   | 1                 | 1        | 1     | 1.0   | Env. CBOs            | 1                 | 0        | 0     | 0.3   | Primary court         | 1                 | 0        | 0     | 0.3   |
| NR dept, region        | 1                 | 1        | 1     | 1.0   | Private business     | 1                 | 0        | 0     | 0.3   | Private business      | 1                 | 0        | 0     | 0.3   |
| Ward HIV commit.       | 1                 | 1        | 1     | 1.0   | Deg centralization   | 0.386             | 0.325    | 0.410 | 0.374 | Neighoring vill.      | 1                 | 0        | 0     | 0.3   |
| District court         | 1                 | 0        | 1     | 0.7   | Density              | 0.313             | 0.248    | 0.286 | 0.282 | Deg centralization    | 0.304             | 0.320    | 0.231 | 0.285 |
| Distr. commissioner    | 2                 | 0        | 0     | 0.7   | Ave degree           | 10.629            | 7.200    | 7.714 | 8.514 | Density               | 0.144             | 0.131    | 0.086 | 0.120 |
| Development donor      | 1                 | 0        | 1     | 0.7   |                      |                   |          |       |       | Ave degree            | 4.944             | 3.655    | 2.824 | 3.808 |
| Research institution   | 1                 | 0        | 1     | 0.7   |                      |                   |          |       |       |                       |                   |          |       |       |
| Private dev. actor     | 1                 | 0        | 1     | 0.7   |                      |                   |          |       |       |                       |                   |          |       |       |
| Private business       | 1                 | 0        | 0     | 0.3   |                      |                   |          |       |       |                       |                   |          |       |       |
| NAFRAC                 | 1                 | 0        | 0     | 0.3   |                      |                   |          |       |       |                       |                   |          |       |       |
| Deg centralization     | 0.326             | 0.282    | 0.356 | 0.321 |                      |                   |          |       |       |                       |                   |          |       |       |
| Density                | 0.237             | 0.164    | 0.149 | 0.183 |                      |                   |          |       |       |                       |                   |          |       |       |
| Ave degree             | 9.953             | 5.667    | 5.800 | 7.140 |                      |                   |          |       |       |                       |                   |          |       |       |
